# Supplementary material for: Deubiquitinase OTUD6A promotes proliferation of cancer cells via regulating Drp1 stability and mitochondrial fission
Source: PubMed Central journal article supplement (PMC7718948; doi:10.1002/1878-0261.12825), 2020-11-06

**A**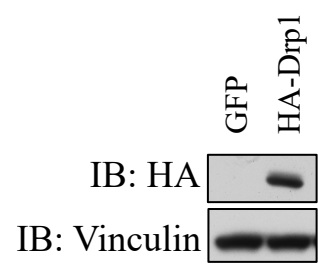**B**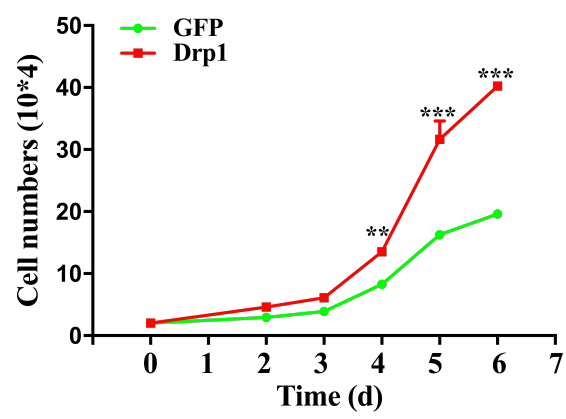**C**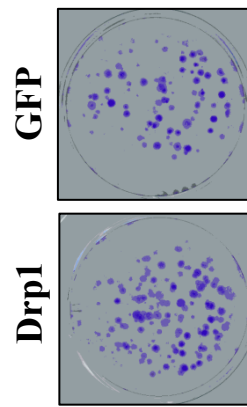**D**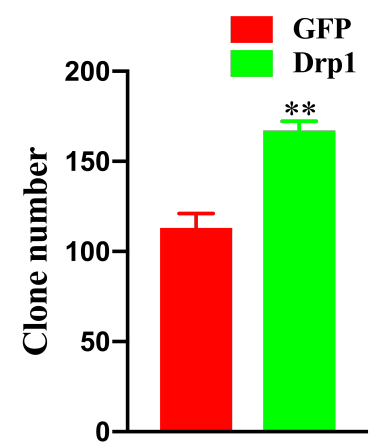

Supplement: MOL2-14-3169-s003.pdf [file MOL2-14-3169-s003.pdf]
